# Supplementary material for: Quantification of sucralose in groundwater well drinking water by silylation derivatization and gas chromatography-mass spectrometry
Source: Royal Society of Chemistry journal article supplement (doi:10.1039/c9ay00442d), 2019-01-01
Supplement: c9ay00442d1.pdf [file c9ay00442d1.pdf]

Supplementary Information

Quantification of Sucralose in Groundwater Well Drinking Water by Silylation Derivatization and Gas Chromatography-Mass Spectrometry

Stefan Voss<sup>#,%</sup>, Elisabeth Newman<sup>%</sup>, Justin P. Miller-Schulze<sup>%,\*</sup>

<sup>#</sup>: United States Geological Survey, California Water Science Center; Sacramento, CA

<sup>%</sup>: Department of Chemistry, California State University, Sacramento; Sacramento, CA

<sup>\*</sup>: Corresponding Author

# Quantification of Sucralose in Groundwater Well Drinking Water by Silylation Derivatization and Gas Chromatography-Mass Spectrometry

Voss, et al

Supplemental Information

In this Supplemental Information (SI), further details on the sample collection (Section S2.2), instrumental data analysis (Section S2.3), and EI fragmentation (Section S3.1) can be found. In addition, sample data for all samples (Table S1), matrix spike samples (Table S2), the speculated identities of the fragments discussed in S3.1 (S3A and S3VB), the NICI-GC-MS spectra of *d*6-TMS-sucralose (Figure S1) tabulated abundances of observed and speculated fragments (Table S4) are presented.

## Experimental

### S2.2 Sample Processing and Derivatization Details

Samples collected in this study used a stratified, random, grid-based design for well selection [1, 2], thus the wells are considered representative of the groundwater resources in the basins currently used for domestic drinking water. Well locations and results for analyses of major ions, trace elements, nutrients, pesticide constituents, volatile organic compounds, microbial indicator constituents, and groundwater age-dating tracers are available in Bennett et al [3].

Of the four batches of environmental and QA/QC samples analyzed, the third batch showed elevated levels of sucralose in all laboratory blanks and environmental samples. A t-based statistical analysis ( $p = 0.013$ ) found that the sucralose concentrations in the method blanks in batch 3 differed significantly from the other three (batches 1, 2 and 4). Figures S1A and S1B display the concentration data in box plots for blanks and groundwater samples. As a result of this, the blanks, matrix spikes, and groundwater samples were excluded from the final analysis because they are not representative of the performance of the method itself.

Contamination of the third batch by repeatedly-used items such as micropipettors is the most likely source of contamination in the method. Further data obtained by this method (data not shown) indicates contamination at levels similar to that of batches 1, 2, and 4 and so we speculate that a grossly contaminated pipette tip or other component was removed from the system between the processing of batches 3 and 4.

### S2.3 Instrumental Analysis Details

For quantitative analysis, the MS was operated in selected ion mode (SIM). The ions monitored for derivatized sucralose (TMS-sucralose) were  $m/z$  117, 307 – 314, 343, 345, 347, 349, 361, and 363. The dwell time per ion for the TMS-sucralose SIM window was 10 ms (sufficient to provide ca. 15 points per chromatographic peak). For qualitative EI-GC-MS analysis, the (positive mode) MS was operated in scan mode from 30-800  $m/z$ , scanning at 1494 amu/sec and with a peak threshold of 100 at a sampling rate of  $2^2$  (4 samples per ion). Separate, qualitative analyses performed to elucidate the structure of TMS-sucralose using CI-GC-MS, negative mode MS was initially operated in scan mode from 25-900  $m/z$ . Once it was established that the molecular ion and other fragments of interest were in the high mass range, CI-GC-MS spectra were collected in negative mode by scanning from 550-850  $m/z$ , at 732 amu/sec with a peak threshold of 100 at a sampling rate of  $2^3$  (8 samples) per ion.

## Results and Discussion

### S3.1 Detailed Discussion of Fragmentation of TMS-sucralose for Electron Ionization GC-MS

The six-membered ring without the bridging oxygen ( $m/z$  397) losing 89 amu (an O-TMS group) resulting in  $C_{12}H_{25}Cl_1O_3Si_2$  (Fragment D in Table S3A) yields 308  $m/z$ ; this same overall loss could be produced by the six-membered ring with the bridging oxygen losing a methyl group and a TMSOH group (producing

Quantification of Sucralose in Groundwater Well Drinking Water by Silylation Derivatization and Gas Chromatography-Mass Spectrometry

Voss, et al

Supplemental Information

$C_{11}H_{21}Cl_1O_4Si_2$ , Fragment E in Table S3A). In addition, the five-membered ring with the bridging oxygen ( $m/z$  359) could lose a methyl group followed by a loss of 36 amu (HCl), resulting in  $C_{11}H_{21}Cl_1Si_2O_4$  (Fragment B in Table S3A), or lose the oxygen followed by Cl, resulting in  $C_{12}H_{25}Cl_1O_3Si_2$  (Fragment C in Table S3A). Loss of HCl is likely preferable as compared to loss of just chlorine in EI-GC-MS [4], but it is not possible to determine which formula is correct based on the data in Figures 1A and 1B nor the predicted isotope distributions in Table S3A. In addition, the five-membered ring losing an oxygen and a chlorine is isomeric with the six-membered ring losing an oxygen and a TMSO group. A  $m/z$  307 fragment is also observed in Figures 1A and 1B and could be formed by the six-membered ring without the bridging oxygen losing a TMSOH group (Fragment A in Table S3A).

The four proposed pathways for formation of  $m/z$  308, and the proposed pathway for the formation of  $m/z$  307 all contain a single chlorine, as such the isotopic distributions are dominated by the "X+2" peaks for  $m/z$  308 and  $m/z$  307 (occurring at  $m/z$  310 and  $m/z$  309, respectively). The observed isotopic distributions for the cluster of peaks around  $m/z$  308 and  $m/z$  312 for the TMS-sucralose and TMS-*d6*-sucralose, respectively, are presented in Tables S3A and S3B along with the predicted isotopic distributions for each putative fragment. The observed abundances represent the averages of three replicate injections for the deuterated and non-deuterated compounds.

Comparison of the predicted distributions for the  $m/z$  307 cluster/six-membered ring (309 in the deuterated version) and the  $m/z$  308 cluster/five-membered ring (312 in the deuterated version) with the observed abundances in Tables S3A and S3B support a relatively even contribution from the  $m/z$  307 and  $m/z$  308 clusters. The "Sum of Fragments A and B" column in Tables S3A and S3B shows the resulting predicted isotopic abundances from the sum of the five membered ring losing the  $-CH_3$  group and HCl (Fragment B) and the six-membered ring which would produce a  $m/z$  307 peak (Fragment A). In both the non-deuterated (Table S3A) and deuterated (Table S3B) cases, the predicted equally weighted distributions agree well with the observed distribution. It should be noted that it is not possible from the distributions which fragment (B or C) is the five-membered component, however, that the  $m/z$  308 cluster is coming from the five-membered ring is clear from the cluster around  $m/z$  312 in the spectrum of the *d6*-TMS-sucralose. Importantly, this indicates that employing  $m/z$  308 as the quantification ion and using  $m/z$  312 as the corresponding internal standard ion ensures that the analogous fragment is supplying these ions for both the deuterated and non-deuterated TMS-sucralose. In addition, the predicted distributions for both the deuterated and non-deuterated TMS-sucralose fragments indicate a lack of significant contribution of internal standard to analyte and vice-versa.

Quantification of Sucralose in Groundwater Well Drinking Water by Silylation Derivatization and Gas Chromatography-Mass Spectrometry

Voss, et al

Supplemental Information

Figure S1A: Box plot detailing sucralose concentrations in blank samples in contaminated 3<sup>rd</sup> batch as compared with batches 1, 2, and 4. The red line represents median concentration, top and bottom of box represent 75<sup>th</sup> and 25<sup>th</sup> percentiles respectively, and the points above are outliers.

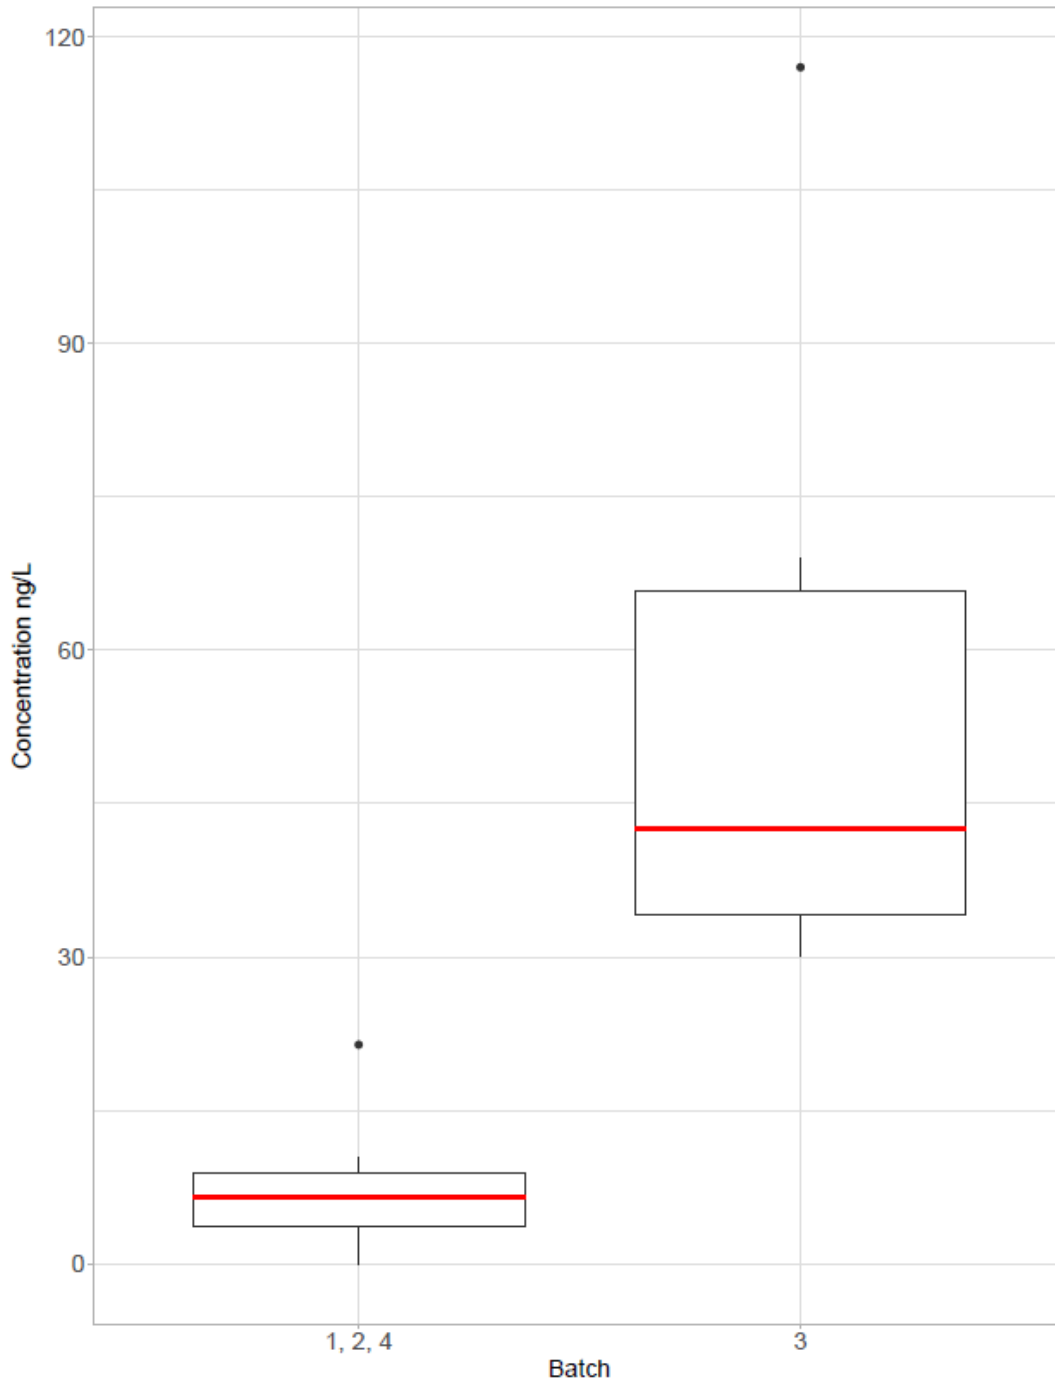

Quantification of Sucralose in Groundwater Well Drinking Water by Silylation Derivatization and Gas Chromatography-Mass Spectrometry

Voss, et al

Supplemental Information

Figure S1B: Box plot showing elevated sucralose concentrations in groundwater samples processed in 3<sup>rd</sup> batch of samples as compared with batches 1, 2, and 4. The red line represents median concentration, top and bottom of box represent 75<sup>th</sup> and 25<sup>th</sup> percentiles respectively, and the points above are outliers.

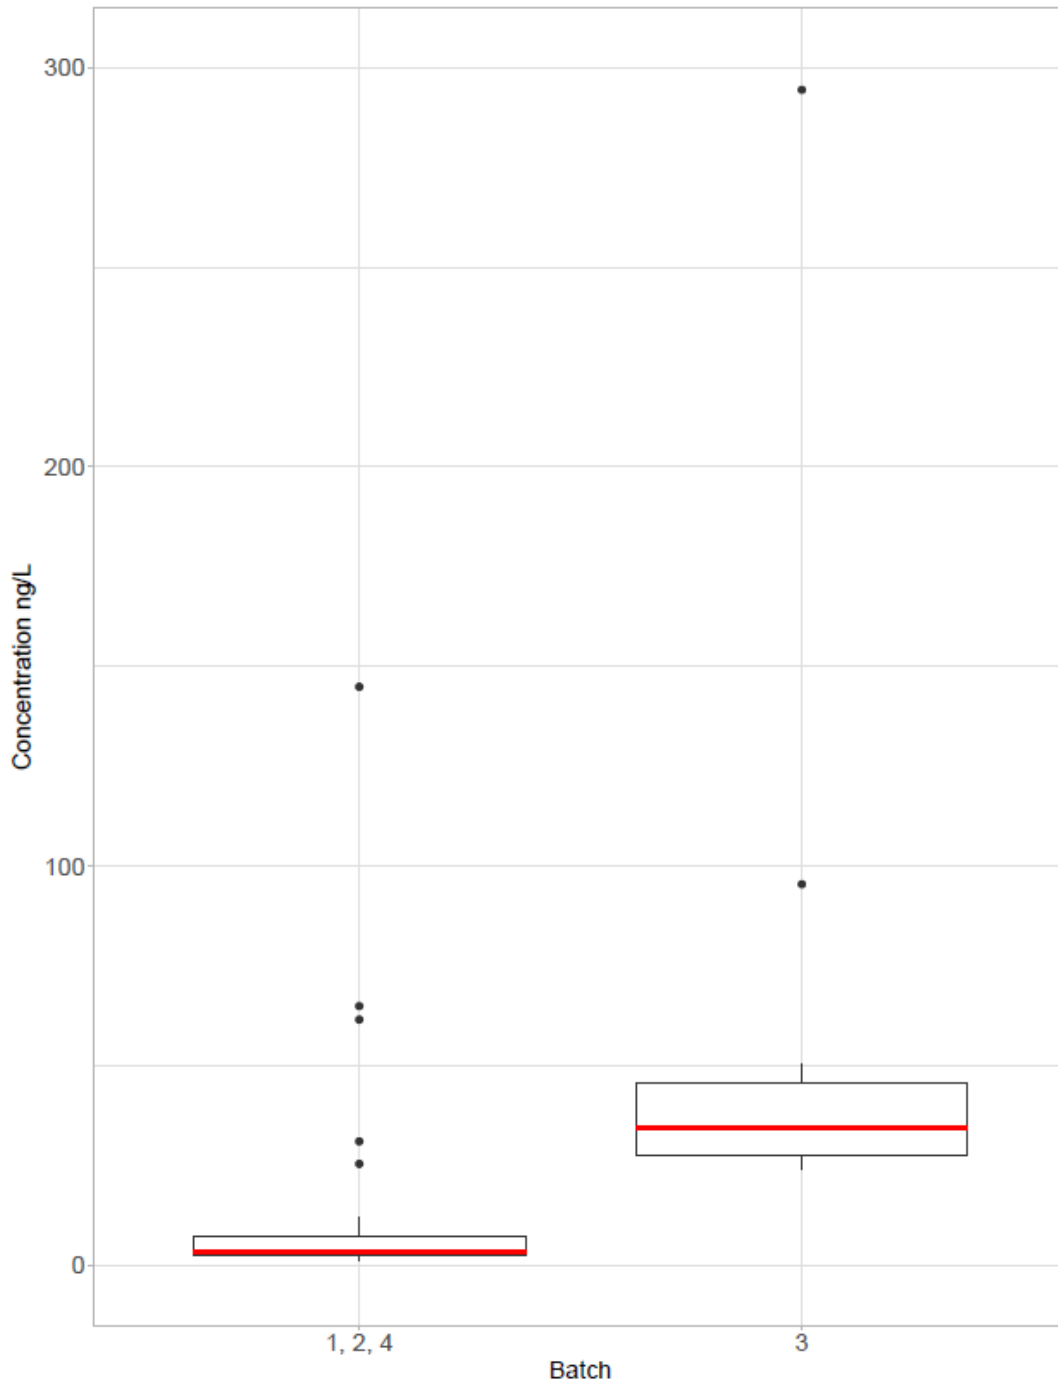

Table S1A (top): Tabulated theoretical (for different structures) and observed abundances for the m/z cluster centered around m/z = 308 in the mass spectrum of TMS-sucralose. Percent abundances are relative to the peak in largest abundance in that cluster.  
 Table S1B (bottom): Tabulated theoretical (for different structures) and observed abundances for the m/z cluster centered around m/z = 309 and 312 in the mass spectrum of TMS-d6-sucralose. Percent abundances are relative to the peak in largest abundance in that cluster.

| Predicted                    |                             |             |                              |                                                 |             |                              |                                 |             |                              | Observed                   |             |                              |                                                   |             |                                  |           |           |           |
|------------------------------|-----------------------------|-------------|------------------------------|-------------------------------------------------|-------------|------------------------------|---------------------------------|-------------|------------------------------|----------------------------|-------------|------------------------------|---------------------------------------------------|-------------|----------------------------------|-----------|-----------|-----------|
| m/z                          | Abundance                   | Percent     | Abundance                    | Percent                                         | Abundance   | Percent                      | Abundance                       | Percent     | Abundance                    | m/z                        | Percent     | RSD(%)                       |                                                   |             |                                  |           |           |           |
| $C_{12}H_{24}Cl_1O_3Si_2$    | 6-Membered Ring<br>-(TMSOH) | FRAGMENT A  | $C_{11}H_{21}Cl_1O_4Si_2$    | 5-Membered Ring + O<br>-(CH <sub>3</sub> , HCl) | FRAGMENT B  | $C_{12}H_{25}Cl_1O_3Si_2$    | 6-Membered Ring + O<br>-(O, Cl) | FRAGMENT C  | $C_{12}H_{25}Cl_1O_3Si_2$    | 6-Membered Ring<br>-(TMSO) | FRAGMENT D  | $C_{11}H_{21}Cl_1O_4Si_2$    | 6-Membered Ring + O<br>-(CH <sub>3</sub> , TMSOH) | FRAGMENT E  | SUM of<br>FRAGMENTS<br>A and B   |           |           |           |
| 307.1                        | 100                         | NA          | NA                           | NA                                              | NA          | NA                           | NA                              | NA          | NA                           | NA                         | NA          | NA                           | NA                                                | NA          | 81.0                             |           |           |           |
| 308.1                        | 23.5                        | 100         | 100                          | 100                                             | 100         | 100                          | 100                             | 100         | 100                          | 100                        | 100         | 100                          | 100                                               | 100         | 100                              |           |           |           |
| 309.1                        | 41.8                        | 22.5        | 23.5                         | 23.5                                            | 23.5        | 23.5                         | 22.5                            | 22.5        | 22.5                         | 22.5                       | 22.5        | 22.5                         | 22.5                                              | 22.5        | 52.1                             |           |           |           |
| 310.1                        | 9.1                         | 41.7        | 41.8                         | 41.8                                            | 41.8        | 41.8                         | 41.7                            | 41.7        | 41.7                         | 41.7                       | 41.7        | 41.7                         | 41.7                                              | 41.7        | 41.1                             |           |           |           |
| 311.1                        | 3.4                         | 8.7         | 9.1                          | 9.1                                             | 9.1         | 9.1                          | 8.7                             | 8.7         | 8.7                          | 8.7                        | 8.7         | 8.7                          | 8.7                                               | 8.7         | 9.8                              |           |           |           |
| 312.1                        | 0.5                         | 3.4         | 3.4                          | 3.4                                             | 3.4         | 3.4                          | 3.4                             | 3.4         | 3.4                          | 3.4                        | 3.4         | 3.4                          | 3.4                                               | 3.4         | 3.2                              |           |           |           |
| 313.1                        | 0.1                         | 0.5         | 0.5                          | 0.5                                             | 0.5         | 0.5                          | 0.5                             | 0.5         | 0.5                          | 0.5                        | 0.5         | 0.5                          | 0.5                                               | 0.5         | 0.5                              |           |           |           |
| 314.1                        | 0.0                         | 0.1         | 0.1                          | 0.1                                             | 0.1         | 0.1                          | 0.1                             | 0.1         | 0.1                          | 0.1                        | 0.1         | 0.1                          | 0.1                                               | 0.1         | 0.1                              |           |           |           |
| <b>Predicted</b>             |                             |             |                              |                                                 |             |                              |                                 |             |                              | <b>Observed</b>            |             |                              |                                                   |             |                                  |           |           |           |
| $C_{12}H_{22}D_2Cl_1O_3Si_2$ | 6-Membered Ring<br>-(TMSOH) | FRAGMENT A' | $C_{11}H_{17}D_4Cl_1O_4Si_2$ | 5-Membered Ring + O<br>-(CH <sub>3</sub> , HCl) | FRAGMENT B' | $C_{12}H_{21}D_4Cl_1O_3Si_2$ | 6-Membered Ring + O<br>-(O, Cl) | FRAGMENT C' | $C_{12}H_{23}D_2Cl_1O_3Si_2$ | 6-Membered Ring<br>-(TMSO) | FRAGMENT D' | $C_{11}H_{19}D_2Cl_1O_4Si_2$ | 6-Membered Ring + O<br>-(CH <sub>3</sub> , TMSOH) | FRAGMENT E' | SUM of<br>FRAGMENTS<br>A' and B' |           |           |           |
| 308.1                        | NA                          | NA          | NA                           | NA                                              | NA          | NA                           | NA                              | NA          | NA                           | NA                         | NA          | NA                           | NA                                                | NA          | 0.0                              |           |           |           |
| 309.1                        | 100                         | NA          | NA                           | NA                                              | NA          | NA                           | NA                              | NA          | NA                           | NA                         | NA          | NA                           | NA                                                | NA          | 91.7                             |           |           |           |
| 310.1                        | 23.5                        | NA          | NA                           | NA                                              | NA          | NA                           | NA                              | NA          | 100                          | 100                        | 100         | 100                          | 100                                               | 100         | 21.5                             |           |           |           |
| 311.1                        | 41.8                        | NA          | NA                           | NA                                              | NA          | NA                           | NA                              | NA          | 23.5                         | 22.4                       | 22.4        | 22.4                         | 22.4                                              | 22.4        | 38.3                             |           |           |           |
| 312.1                        | 9.1                         | 100         | 100                          | 100                                             | 100         | 100                          | 41.8                            | 41.8        | 41.8                         | 41.7                       | 41.7        | 41.7                         | 41.7                                              | 41.7        | 100                              |           |           |           |
| 313.1                        | 3.4                         | 22.4        | 23.5                         | 23.5                                            | 23.5        | 23.5                         | 9.1                             | 9.1         | 8.7                          | 8.7                        | 8.7         | 8.7                          | 8.7                                               | 8.7         | 23.6                             |           |           |           |
| 314.1                        | 0.5                         | 41.7        | 41.8                         | 41.8                                            | 41.8        | 41.8                         | 3.4                             | 3.4         | 3.4                          | 3.4                        | 3.4         | 3.4                          | 3.4                                               | 3.4         | 38.7                             |           |           |           |
| 315.1                        | 0.1                         | 8.6         | 9.0                          | 9.0                                             | 9.0         | 9.0                          | 0.5                             | 0.5         | 0.5                          | 0.5                        | 0.5         | 0.5                          | 0.5                                               | 0.5         | 8.0                              |           |           |           |
|                              |                             |             |                              |                                                 |             |                              |                                 |             |                              |                            |             |                              |                                                   |             |                                  | Percent   | RSD(%)    | Percent   |
|                              |                             |             |                              |                                                 |             |                              |                                 |             |                              |                            |             |                              |                                                   |             |                                  | Abundance | Abundance | Abundance |

Quantification of Sucralose in Groundwater Well Drinking Water by Silylation Derivatization and Gas Chromatography-Mass Spectrometry  
Voss, et al  
Supplemental Information

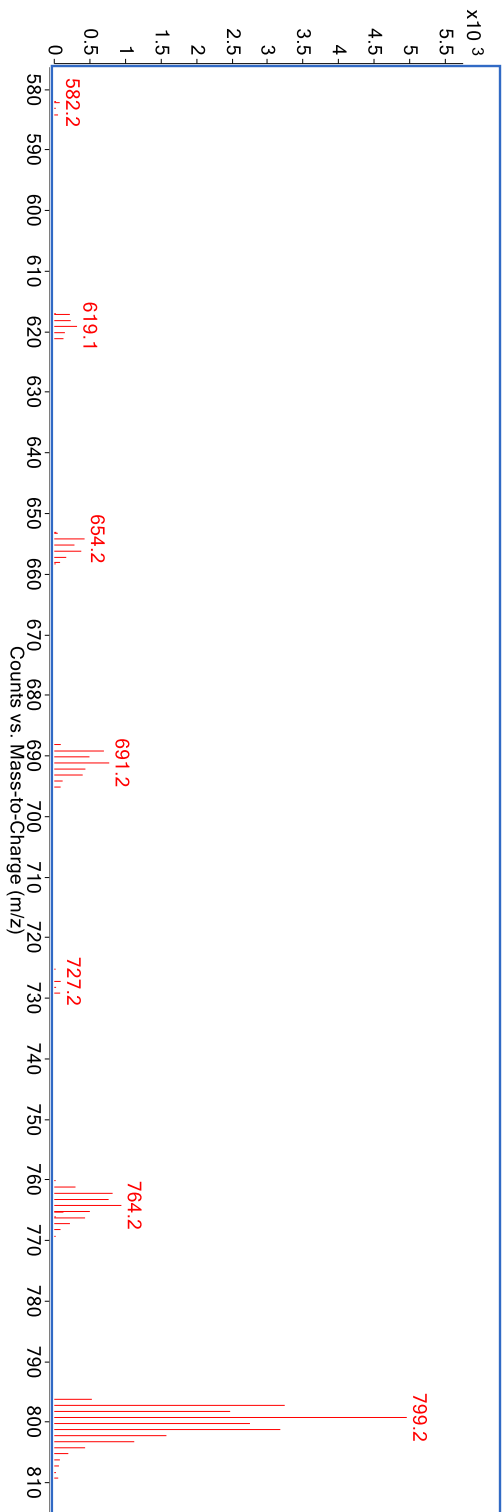

Figure S2: NCI-GC-MS Spectra of TMS-d6-sucralose

Quantification of Sucralose in Groundwater Well Drinking Water by Silylation Derivatization and Gas Chromatography-Mass Spectrometry

Voss, et al

Supplemental Information

Table S2: Tabulated theoretical and observed abundances for major m/z clusters observed in the NICI-GC-MS spectra of TMS-d6-sucralose

| <b>5 TMS-d6-sucralose (M+e<sup>-</sup>) (C<sub>27</sub>H<sub>53</sub>D<sub>6</sub>Cl<sub>3</sub>O<sub>8</sub>Si<sub>5</sub>)</b> |                   |       |                   |                              |
|----------------------------------------------------------------------------------------------------------------------------------|-------------------|-------|-------------------|------------------------------|
|                                                                                                                                  | Theoretical       |       | Observed          |                              |
| m/z                                                                                                                              | Percent Abundance | m/z   | Percent Abundance | RSD (%) of Percent Abundance |
| NA                                                                                                                               | NA                | 760.2 | 2.0               | 155.4                        |
| NA                                                                                                                               | NA                | 761.2 | 28.6              | 10.5                         |
| 762.3                                                                                                                            | 77.5              | 762.2 | 84.0              | 3.4                          |
| 763.3                                                                                                                            | 43.0              | 763.2 | 75.0              | 6.4                          |
| 764.2                                                                                                                            | 100.0             | 764.2 | 100.0             | 0.0                          |
| 765.2                                                                                                                            | 50.5              | 765.2 | 56.2              | 10.4                         |
| 766.2                                                                                                                            | 51.4              | 766.2 | 46.6              | 23.6                         |
| 767.2                                                                                                                            | 22.8              | 767.2 | 21.8              | 5.9                          |
| 768.2                                                                                                                            | 13.5              | 768.2 | 10.4              | 9.3                          |
| <b>5 TMS-d6-Sucralose + Cl (C<sub>27</sub>H<sub>53</sub>D<sub>6</sub>Cl<sub>4</sub>O<sub>8</sub>Si<sub>5</sub>)</b>              |                   |       |                   |                              |
|                                                                                                                                  | Theoretical       |       | Observed          |                              |
| m/z                                                                                                                              | Percent Abundance | m/z   | Percent Abundance | RSD (%) of Percent Abundance |
| NA                                                                                                                               | NA                | 795.2 | 0.4               | 156.0                        |
| NA                                                                                                                               | NA                | 796.2 | 11.5              | 4.8                          |
| 797.2                                                                                                                            | 62.1              | 797.2 | 65.2              | 2.4                          |
| 798.2                                                                                                                            | 34.5              | 798.2 | 48.9              | 2.8                          |
| 799.2                                                                                                                            | 100.0             | 799.2 | 100.0             | 0.0                          |
| 800.2                                                                                                                            | 51.5              | 800.2 | 57.7              | 3.4                          |
| 801.2                                                                                                                            | 66.9              | 801.2 | 65.5              | 3.5                          |
| 802.2                                                                                                                            | 31.2              | 802.2 | 31.8              | 2.7                          |
| 803.2                                                                                                                            | 24.0              | 803.2 | 22.7              | 3.1                          |
| 804.2                                                                                                                            | 9.9               | 804.2 | 9.1               | 6.3                          |
| 805.2                                                                                                                            | 5.0               | 805.2 | 4.4               | 10.7                         |
| 806.2                                                                                                                            | 1.8               | 806.2 | 1.4               | 32.0                         |
| 807.2                                                                                                                            | 0.6               | 807.2 | 1.0               | 24.8                         |
| 808.2                                                                                                                            | 0.2               | 808.2 | 0.5               | 109.6                        |
| 809.2                                                                                                                            | 0.0               | 809.2 | 1.0               | 28.0                         |
| <b>5 TMS-d6-Sucralose -1TMS (C<sub>24</sub>H<sub>44</sub>D<sub>6</sub>Cl<sub>3</sub>O<sub>8</sub>Si<sub>4</sub>)</b>             |                   |       |                   |                              |
|                                                                                                                                  | Theoretical       |       | Observed          |                              |
| m/z                                                                                                                              | Percent Abundance | m/z   | Percent Abundance | RSD (%) of Percent Abundance |
| NA                                                                                                                               | NA                | 688.1 | 12.9              | 22.6                         |
| 689.2                                                                                                                            | 82.3              | 689.2 | 84.1              | 6.4                          |
| 690.2                                                                                                                            | 38.8              | 690.2 | 57.5              | 10.6                         |
| 691.2                                                                                                                            | 100.0             | 691.2 | 100.0             | 0.0                          |
| 692.2                                                                                                                            | 43.7              | 692.2 | 50.4              | 19.8                         |
| 693.2                                                                                                                            | 47.3              | 693.2 | 46.5              | 7.1                          |
| 694.2                                                                                                                            | 18.5              | 694.1 | 18.1              | 10.1                         |
| 695.2                                                                                                                            | 11.1              | 695.2 | 8.0               | 35.9                         |



Quantification of Sucralose in Groundwater Well Drinking Water by Silylation Derivatization and Gas Chromatography-Mass Spectrometry

Voss, et al

Supplemental Information

Table S3: Sample ID, water volume, instrumental concentration, calculated mass of sucralose per sample, calculated environmental concentration and reported concentration of entire dataset.

| <b>Table S3</b>  |          |                                |                    |                               |                               |
|------------------|----------|--------------------------------|--------------------|-------------------------------|-------------------------------|
| Data release ID  | Vol (mL) | Instrument Concentration (ppb) | Mass per vial (ng) | Concentration in water (ng/L) | Reported Concentration (ng/L) |
| GWNPB1           | 500      | 42.87                          | 10.72              | 21.43                         | -                             |
| GWNPB2           | 530      | 21.76                          | 5.44               | 10.26                         | -                             |
| GWNPB3           | 485      | 20.33                          | 5.08               | 10.48                         | -                             |
| GWNPB4           | 520      | 18.52                          | 4.63               | 8.90                          | -                             |
| GWNPB4r          | 520      | 19.42                          | 4.86               | 9.34                          | -                             |
| GWNPB5           | 481      | 14.64                          | 3.66               | 7.61                          | -                             |
| GWNPB6           | 433      | 4.19                           | 1.05               | 2.42                          | -                             |
| GWNPB7           | 500      | 8.44                           | 2.11               | 4.22                          | -                             |
| GWNPB8           | 465      | 9.46                           | 2.37               | 5.09                          | -                             |
| GWNPB8r          | 465      | 13.37                          | 3.34               | 7.19                          | -                             |
| GWNPB9           | 510      | 13.02                          | 3.25               | 6.38                          | -                             |
| GWNPB10          | 540      | 7.96                           | 1.99               | 3.68                          | -                             |
| GWNPB12          | 540      | 14.48                          | 3.62               | 6.71                          | -                             |
| GWNPB16          | 510      | 13.42                          | 3.35               | 6.58                          | -                             |
| GWNPB17          | NA       | NA                             | NA                 | NA                            | -                             |
| GWNPB19          | 520      | 0.00                           | 0.00               | 0.00                          | -                             |
| GWNPB20          | 550      | 7.27                           | 1.82               | 3.30                          | -                             |
| GWNPB21          | 550      | 7.85                           | 1.96               | 3.57                          | -                             |
| PC1              | 1000     | 716.31                         | 179.08             | 179.08                        | -                             |
| MSPC0808170900   | 1000     | 5464.91                        | 1366.23            | 1366.23                       | -                             |
| MSPC080920171300 | 1000     | 736.02                         | 184.01             | 184.01                        | -                             |
| MSPC0810170920   | 1000     | 602.40                         | 150.60             | 150.60                        | -                             |
| MSPC0821171300   | 1000     | 615.90                         | 153.98             | 153.98                        | -                             |
| MSPC0822171400   | 1000     | 717.96                         | 179.49             | 179.49                        | -                             |
| MSPC0823171200   | 1000     | 637.79                         | 159.45             | 159.45                        | -                             |
| MSPC0911170900   | 1000     | 749.80                         | 187.45             | 187.45                        | -                             |
| MSPC0912171400   | 1000     | 709.48                         | 177.37             | 177.37                        | -                             |
| MSPC0913170930   | 1000     | 784.14                         | 196.03             | 196.03                        | -                             |
| MSPC0914170900   | 1000     | 721.19                         | 180.30             | 180.30                        | -                             |
| MSPC1002171300r  | 1000     | 705.47                         | 176.37             | 176.37                        | -                             |
| MSPC1002171300   | 1000     | 726.97                         | 181.74             | 181.74                        | -                             |
| MSPC1003171300   | 1000     | 708.25                         | 177.06             | 177.06                        | -                             |

Quantification of Sucralose in Groundwater Well Drinking Water by Silylation Derivatization and Gas Chromatography-Mass Spectrometry

Voss, et al

Supplemental Information

| <b>Table S3</b> |          |                                |                    |                               |                               |
|-----------------|----------|--------------------------------|--------------------|-------------------------------|-------------------------------|
| Data release ID | Vol (mL) | Instrument Concentration (ppb) | Mass per vial (ng) | Concentration in water (ng/L) | Reported Concentration (ng/L) |
| MSPC1004171230  | 1000     | 689.99                         | 172.50             | 172.50                        | -                             |
| MSPC1005171230  | 1000     | 677.47                         | 169.37             | 169.37                        | -                             |
| MSPC1016170940  | 1000     | 792.74                         | 198.18             | 198.18                        | -                             |
| MSPC1017170920  | 1000     | 807.01                         | 201.75             | 201.75                        | -                             |
| PCr1            | 1000     | 751.21                         | 187.80             | 187.80                        | -                             |
| MSPC1018171040  | 1000     | 760.38                         | 190.10             | 190.10                        | -                             |
| MSPC1019170920  | 1000     | 787.05                         | 196.76             | 196.76                        | -                             |
| PC101917        | 1000     | 698.79                         | 174.70             | 174.70                        | -                             |
| PC2             | 1000     | 807.56                         | 201.89             | 201.89                        | -                             |
| MSPC1017190920r | 1000     | 718.94                         | 179.73             | 179.73                        | -                             |
| PC3             | 1000     | 756.46                         | 189.12             | 189.12                        | -                             |
| PC4             | 1000     | 822.69                         | 205.67             | 205.67                        | -                             |
| PC5             | 1000     | 737.87                         | 184.47             | 184.47                        | -                             |
| PC6             | 1000     | 819.00                         | 204.75             | 204.75                        | -                             |
| PC7             | 1000     | 842.74                         | 210.68             | 210.68                        | -                             |
| 0824171320      | 1035     | 13.25                          | 3.31               | 3.20                          | ND                            |
| 0809170840      | 985      | 23.61                          | 5.90               | 5.99                          | ND                            |
| 0823171200      | 965      | 27.99                          | 7.00               | 7.25                          | ND                            |
| 0807170830      | 980      | 10.75                          | 2.69               | 2.74                          | ND                            |
| 0823170850      | 1030     | 14.68                          | 3.67               | 3.56                          | ND                            |
| 0824170940      | 980      | 9.14                           | 2.29               | 2.33                          | ND                            |
| 0822171400      | 950      | 18.75                          | 4.69               | 4.93                          | ND                            |
| 0808170900      | 535      | 26.99                          | 6.75               | 12.61                         | ND                            |
| 0821170900      | 1037     | 10.44                          | 2.61               | 2.52                          | ND                            |
| 0809171300      | 555      | 7.17                           | 1.79               | 3.23                          | ND                            |
| 0810170920      | 580      | 24.54                          | 6.13               | 10.58                         | ND                            |
| 0808171200      | 965      | 12.54                          | 3.14               | 3.25                          | ND                            |
| 0822170840      | 890      | 11.91                          | 2.98               | 3.35                          | ND                            |
| 0807171200      | 485      | 1405.98                        | 351.50             | 724.73                        | >                             |
| 0810171240      | 975      | 99.06                          | 24.76              | 25.40                         | 25.40                         |
| 0823170850r     | 1030     | 18.00                          | 4.50               | 4.37                          | ND                            |
| 0809171300r     | 555      | 9.31                           | 2.33               | 4.20                          | ND                            |
| 0911171500      | 982      | 5.75                           | 1.44               | 1.46                          | ND                            |
| 0912170900      | 957      | 46.31                          | 11.58              | 12.10                         | ND                            |
| 0912171400      | 980      | 4.97                           | 1.24               | 1.27                          | ND                            |
| 0913170930      | 956      | 5.57                           | 1.39               | 1.46                          | ND                            |

Quantification of Sucralose in Groundwater Well Drinking Water by Silylation Derivatization and Gas Chromatography-Mass Spectrometry

Voss, et al

Supplemental Information

| <b>Table S3</b> |          |                                |                    |                               |                               |
|-----------------|----------|--------------------------------|--------------------|-------------------------------|-------------------------------|
| Data release ID | Vol (mL) | Instrument Concentration (ppb) | Mass per vial (ng) | Concentration in water (ng/L) | Reported Concentration (ng/L) |
| 0913171330      | 1032     | 6.35                           | 1.59               | 1.54                          | ND                            |
| 0914170900      | 968      | 251.39                         | 62.85              | 64.92                         | 64.92                         |
| 1002170930      | 1070     | 13.98                          | 3.49               | 3.27                          | ND                            |
| 1002171300      | 1036     | 9.03                           | 2.26               | 2.18                          | ND                            |
| 1003170930      | 885      | 6.86                           | 1.72               | 1.94                          | ND                            |
| 1004170930      | 930      | 10.25                          | 2.56               | 2.75                          | ND                            |
| 1005171230      | 1064     | 34.72                          | 8.68               | 8.16                          | ND                            |
| 1005171230r     | 1064     | 45.38                          | 11.35              | 10.66                         | ND                            |
| 1002171300r     | 1036     | 7.59                           | 1.90               | 1.83                          | ND                            |
| 0914170900r     | 968      | 238.29                         | 59.57              | 61.54                         | 61.54                         |
| 1004171230      | NA       | NA                             | NA                 | NA                            | NA                            |
| 1005170930      | NA       | NA                             | NA                 | NA                            | NA                            |
| 1019170920      | 940      | 10.90                          | 2.73               | 2.90                          | ND                            |
| 103171300       | 990      | 573.83                         | 143.46             | 144.91                        | 144.91                        |
| 1114171000      | 860      | 11.44                          | 2.86               | 3.33                          | ND                            |
| 1113171000      | 890      | 110.45                         | 27.61              | 31.02                         | 31.02                         |
| 1016171230      | NA       | NA                             | NA                 | NA                            | NA                            |
| 1102171130      | NA       | NA                             | NA                 | NA                            | NA                            |
| 1031170900      | NA       | NA                             | NA                 | NA                            | NA                            |
| MS0822171400r   | 490      | 525.76                         | 131.44             | 268.24                        | 268.24                        |
| MS0822171400    | 490      | 625.94                         | 156.48             | 319.35                        | 319.35                        |
| MS0823171200    | 500      | 666.21                         | 166.55             | 333.10                        | 333.10                        |
| MS0911170900    | 448      | 681.41                         | 170.35             | 380.25                        | 380.25                        |
| MS0914170900    | 489      | 794.47                         | 198.62             | 406.17                        | 406.17                        |
| MS1002171300    | 500      | 724.23                         | 181.06             | 362.11                        | 362.11                        |
| MS1004171230    | 555      | 746.17                         | 186.54             | 336.11                        | 336.11                        |
| MS1005171230    | 530      | 671.28                         | 167.82             | 316.64                        | 316.64                        |
| MS1016170940    | 585      | 1126.07                        | 281.52             | 481.22                        | 481.22                        |
| MS1019170920    | 495      | 822.55                         | 205.64             | 415.43                        | 415.43                        |
| MS1031171300    | 505      | 705.12                         | 176.28             | 349.07                        | 349.07                        |
| MS1101171230    | 490      | 594.33                         | 148.58             | 303.23                        | 303.23                        |
| MS1113171230    | 470      | 783.26                         | 195.81             | 416.63                        | 416.63                        |
| MS1114171000r   | 460      | 865.84                         | 216.46             | 470.56                        | 470.56                        |
| MS1114171000    | 460      | 854.57                         | 213.64             | 464.44                        | 464.44                        |
| MS0821171300    | NA       | NA                             | NA                 | NA                            | NA                            |

Quantification of Sucralose in Groundwater Well Drinking Water by Silylation Derivatization and Gas Chromatography-Mass Spectrometry

Voss, et al

Supplemental Information

Footnotes to Table S1: Sample IDs are unique numerical codes derived from sample time and date. QC samples are coded as follows: GWNPB# = blank, PC# = positive control, MSPC# = matrix spike paired positive control, MS# = matrix spike. The reported concentration is ng/L in water, with ND referring to below the detection limit of 21.8 ng/L, NA referring to “not analyzed”, and > referring to detection above the calibration range.

Table S4. Matrix spike samples with instrumental concentrations, matched positive control spiked masses, and calculated accuracies and recoveries.

| Matrix Spike ID | Sucralose Mass (ng) | % Accuracy | PC mass | % Recovery |
|-----------------|---------------------|------------|---------|------------|
| MS0822171400    | 141.5               | 69%        | 179.5   | 79%        |
| MS0823171200    | 162.9               | 79%        | 159.4   | 102%       |
| MS0911170900    | 147.8               | 72%        | 187.5   | 79%        |
| MS0914170900    | 166.9               | 81%        | 180.3   | 93%        |
| MS1002171300    | 180.0               | 88%        | 181.7   | 99%        |
| MS1004171230    | 186.5               | 91%        | 172.5   | 108%       |
| MS1005171230    | 163.5               | 80%        | 169.4   | 97%        |
| MS1019170920    | 204.2               | 99%        | 196.8   | 104%       |
| MS1031171300    | 103.1               | 50%        | 177.1   | 58%        |
| MS1101171230    | 135.5               | 66%        | 184.5   | 73%        |
| MS1113171230    | 183.8               | 89%        | 204.7   | 90%        |
| MS1114171000    | 201.9               | 98%        | 210.7   | 96%        |

Quantification of Sucralose in Groundwater Well Drinking Water by Silylation Derivatization and Gas Chromatography-Mass Spectrometry

Voss, et al

Supplemental Information

References

1. USGS-GAMA. *California Water Quality Groundwater Ambient Monitoring & Assessment (GAMA)*. 2019; Available from: <https://ca.water.usgs.gov/gama/>.
2. California State Water Resources Control Board. *Groundwater Ambient Monitoring and Assessment Program (GAMA)*. 2019; Available from: <https://www.waterboards.ca.gov/gama/>.
3. Bennett, G.L., V, Shelton, J.L., and Jasper, M., *Groundwater-quality data in the Sacramento Metropolitan Shallow Aquifer Study Unit, 2017: Results from the California GAMA Priority Basin Project*. U.S. Geological Survey data release, 2019.
4. McLafferty, F.W.T., Frantisek, *Interpretation of Mass Spectra, 4th ed.* (McLafferty, Fred W.; Turecek, Frantisek).
